# Supplementary material for: Normative Mineralogy of 1170 Soil Profiles across Canada
Source: MDPI journal article supplement (doi:10.3390/min13040544), 2023-04-12
Supplement: s1 [file s1]

# Supplementary Materials: Normative Mineralogy of 1170 Soil Profiles Across Canada

Margot Aldis, Maximilian Posch and Julian Aherne \*

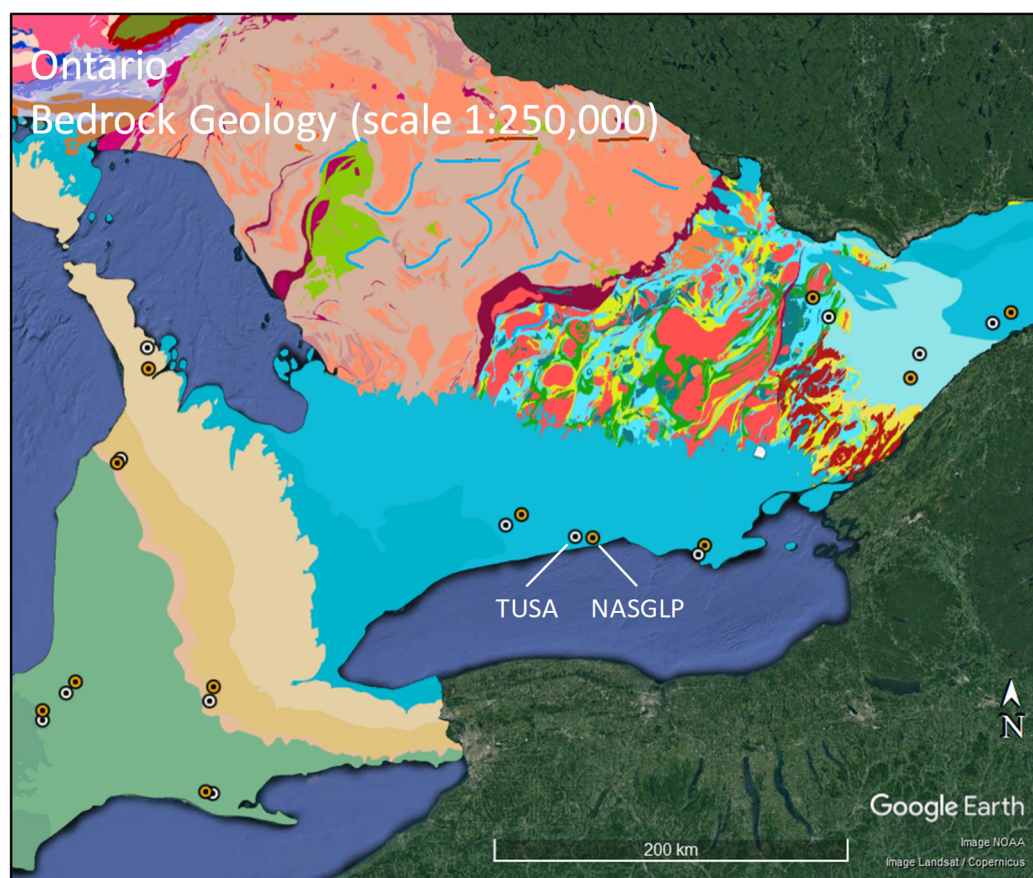

**Figure S1.** Location of the 12 ‘paired’ Trent University Soil Archive (TUSA; white) and North American Soil Geochemical Landscape Project (NASGLP; orange) sampling sites in Ontario where major oxide content in soil (depth-weighted to a maximum of 50 cm) were compared. The sites are overlaid on the 1:250 000 scale bedrock geology map of Ontario.

**Table S1.** Statistical comparison (paired t-test) of major oxide content in soil (depth-weighted to a maximum of 50 cm) from the 12 ‘paired’ Trent University Soil Archive (TUSA; T) and North American Soil Geochemical Landscape Project (NASGLP; N) sites in Ontario. See Figure S1 for location of the sites. A  $p > 0.05$  indicates no statistical difference between the paired sites.

| #        | SiO <sub>2</sub> |       | TiO <sub>2</sub> |      | Al <sub>2</sub> O <sub>3</sub> |       | Fe <sub>2</sub> O <sub>3</sub> |      | MnO  |      | MgO  |      | CaO   |       | K <sub>2</sub> O |      | Na <sub>2</sub> O |      | P <sub>2</sub> O <sub>5</sub> |      |
|----------|------------------|-------|------------------|------|--------------------------------|-------|--------------------------------|------|------|------|------|------|-------|-------|------------------|------|-------------------|------|-------------------------------|------|
|          | N                | T     | N                | T    | N                              | T     | N                              | T    | N    | T    | N    | T    | N     | T     | N                | T    | N                 | T    | N                             | T    |
| 1        | 64.94            | 72.59 | 0.60             | 0.45 | 11.41                          | 10.98 | 4.01                           | 3.74 | 0.07 | 0.08 | 3.61 | 0.64 | 6.55  | 1.70  | 2.65             | 2.28 | 1.20              | 2.35 | 0.13                          | 0.11 |
| 2        | 72.38            | 70.07 | 0.70             | 0.72 | 9.56                           | 11.81 | 5.07                           | 4.47 | 0.11 | 0.10 | 1.00 | 1.10 | 2.46  | 1.27  | 1.97             | 2.53 | 2.13              | 1.71 | 0.17                          | 0.10 |
| 3        | 67.65            | 58.71 | 0.57             | 0.14 | 10.58                          | 4.50  | 3.85                           | 2.04 | 0.06 | 0.05 | 3.13 | 2.83 | 5.29  | 13.97 | 2.79             | 0.92 | 0.82              | 0.67 | 0.09                          | 0.05 |
| 4        | 72.66            | 65.15 | 0.47             | 0.73 | 10.10                          | 13.92 | 5.22                           | 5.75 | 0.17 | 0.12 | 1.14 | 1.54 | 1.64  | 0.97  | 2.14             | 3.22 | 1.45              | 1.01 | 0.11                          | 0.10 |
| 5        | 73.93            | 68.46 | 0.51             | 0.72 | 9.53                           | 12.36 | 4.37                           | 5.42 | 0.07 | 0.12 | 0.98 | 1.24 | 3.78  | 1.75  | 1.88             | 2.55 | 2.53              | 1.79 | 0.15                          | 0.15 |
| 6        | 74.37            | 73.85 | 0.48             | 0.48 | 11.33                          | 11.25 | 2.80                           | 4.01 | 0.07 | 0.11 | 1.07 | 0.83 | 2.94  | 2.09  | 2.32             | 2.27 | 3.12              | 2.81 | 0.19                          | 0.11 |
| 7        | 58.06            | 65.57 | 0.43             | 0.88 | 7.31                           | 12.42 | 2.96                           | 6.76 | 0.06 | 0.12 | 1.10 | 1.69 | 11.73 | 2.71  | 1.35             | 1.86 | 1.60              | 2.37 | 0.14                          | 0.20 |
| 8        | 65.46            | 72.09 | 0.51             | 0.50 | 9.47                           | 11.26 | 3.44                           | 3.73 | 0.09 | 0.09 | 1.43 | 1.26 | 9.48  | 1.70  | 2.02             | 2.31 | 1.17              | 1.49 | 0.24                          | 0.10 |
| 9        | 68.58            | 60.39 | 0.60             | 0.68 | 12.41                          | 14.49 | 4.52                           | 6.18 | 0.11 | 0.12 | 1.55 | 2.08 | 3.32  | 2.99  | 2.37             | 2.04 | 3.06              | 2.47 | 0.19                          | 0.27 |
| 10       | 74.38            | 68.06 | 0.41             | 0.45 | 9.52                           | 12.13 | 2.42                           | 3.84 | 0.05 | 0.06 | 0.81 | 0.88 | 2.21  | 2.28  | 2.02             | 2.28 | 2.68              | 2.34 | 0.12                          | 0.11 |
| 11       | 70.28            | 66.68 | 0.62             | 0.61 | 10.85                          | 12.47 | 3.52                           | 4.72 | 0.05 | 0.09 | 0.91 | 1.26 | 2.06  | 2.82  | 2.31             | 2.52 | 2.47              | 1.85 | 0.17                          | 0.26 |
| 12       | 65.98            | 61.45 | 0.57             | 0.61 | 11.05                          | 12.09 | 4.12                           | 4.30 | 0.13 | 0.06 | 3.99 | 1.23 | 5.72  | 1.92  | 2.39             | 2.41 | 1.79              | 1.34 | 0.17                          | 0.16 |
| <i>p</i> | 0.25             |       | 0.52             |      | 0.12                           |       | 0.10                           |      | 0.56 |      | 0.35 |      | 0.21  |       | 0.71             |      | 0.39              |      | 0.48                          |      |

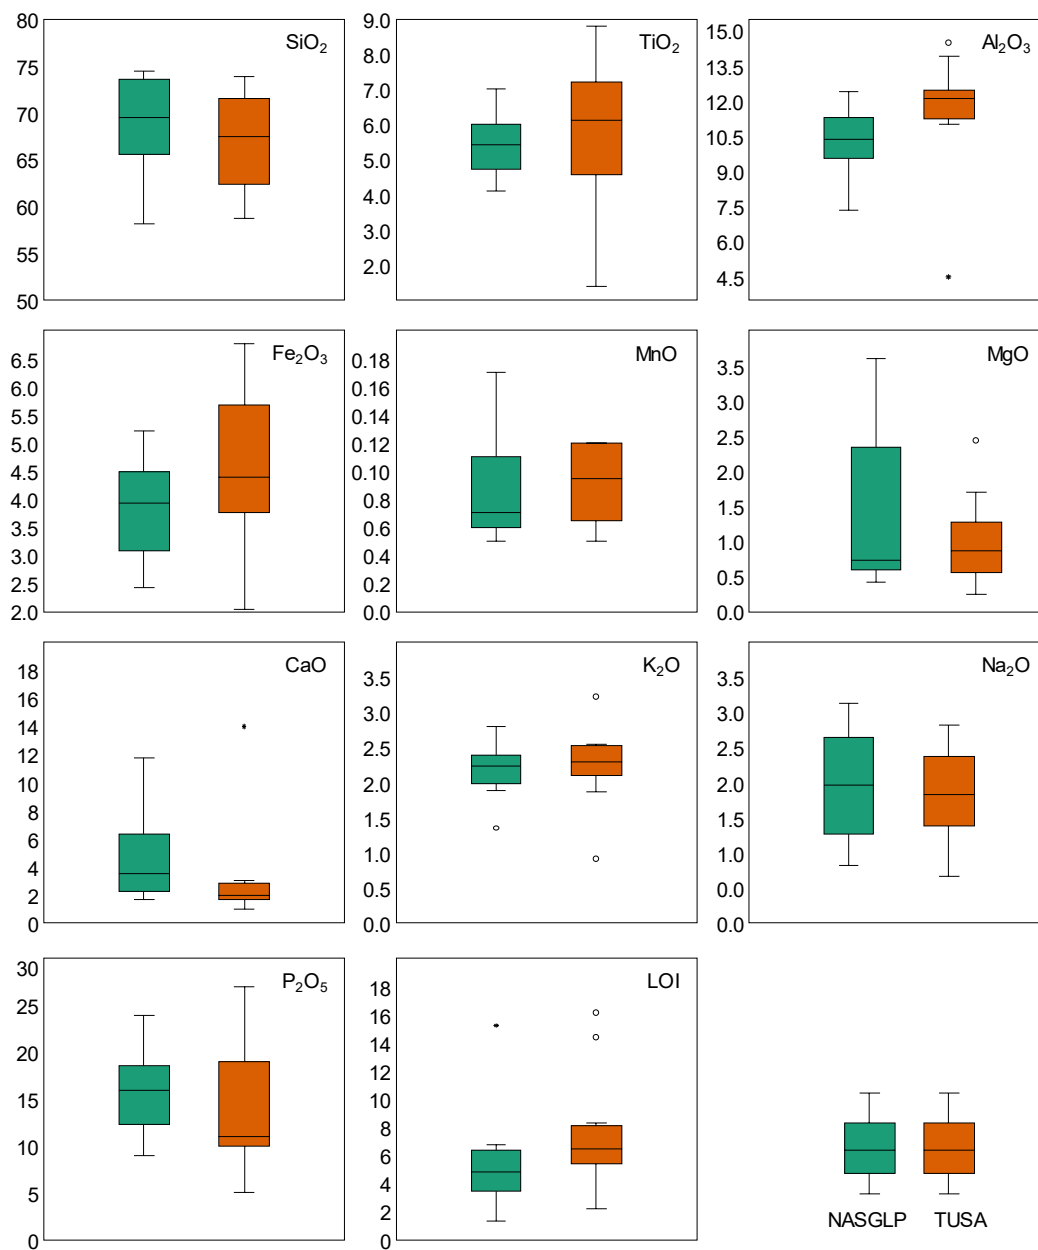

**Figure S2.** Boxplots of major oxide content in soil (depth-weighted to a maximum of 50 cm) from the 12 ‘paired’ Trent University Soil Archive (TUSA; orange) and North American Soil Geochemical Landscape Project (NASGLP; green) sites in Ontario. See Table S1 for data and Figure S1 for location of the sites.

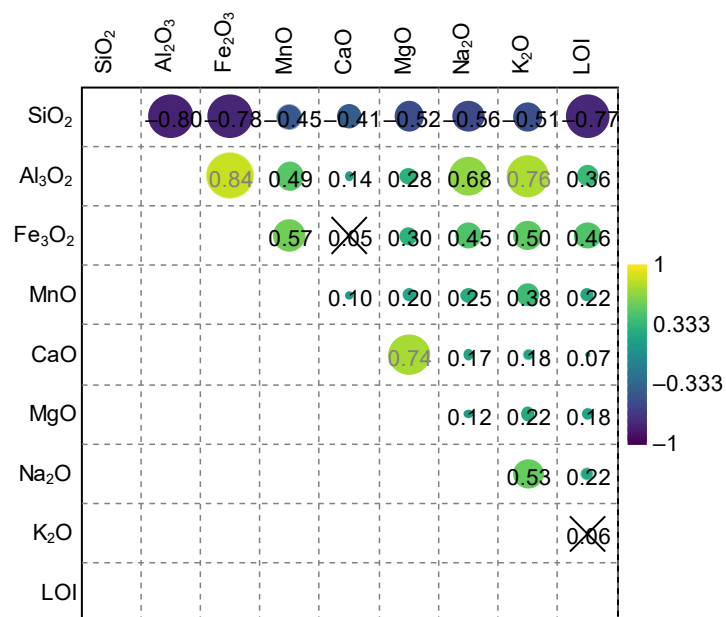

**Figure S3.** Correlation matrix of major oxide content (wt%) and organic matter content (%LOI) in soil (depth-weighted to a maximum of 50 cm) for study sites across Canada (n=1170) from the Trent University Soil Archive and North American Soil Geochemical Landscape Project. The strength of the correlation (r) is shown, and associations indicated by an 'X' are not significant.

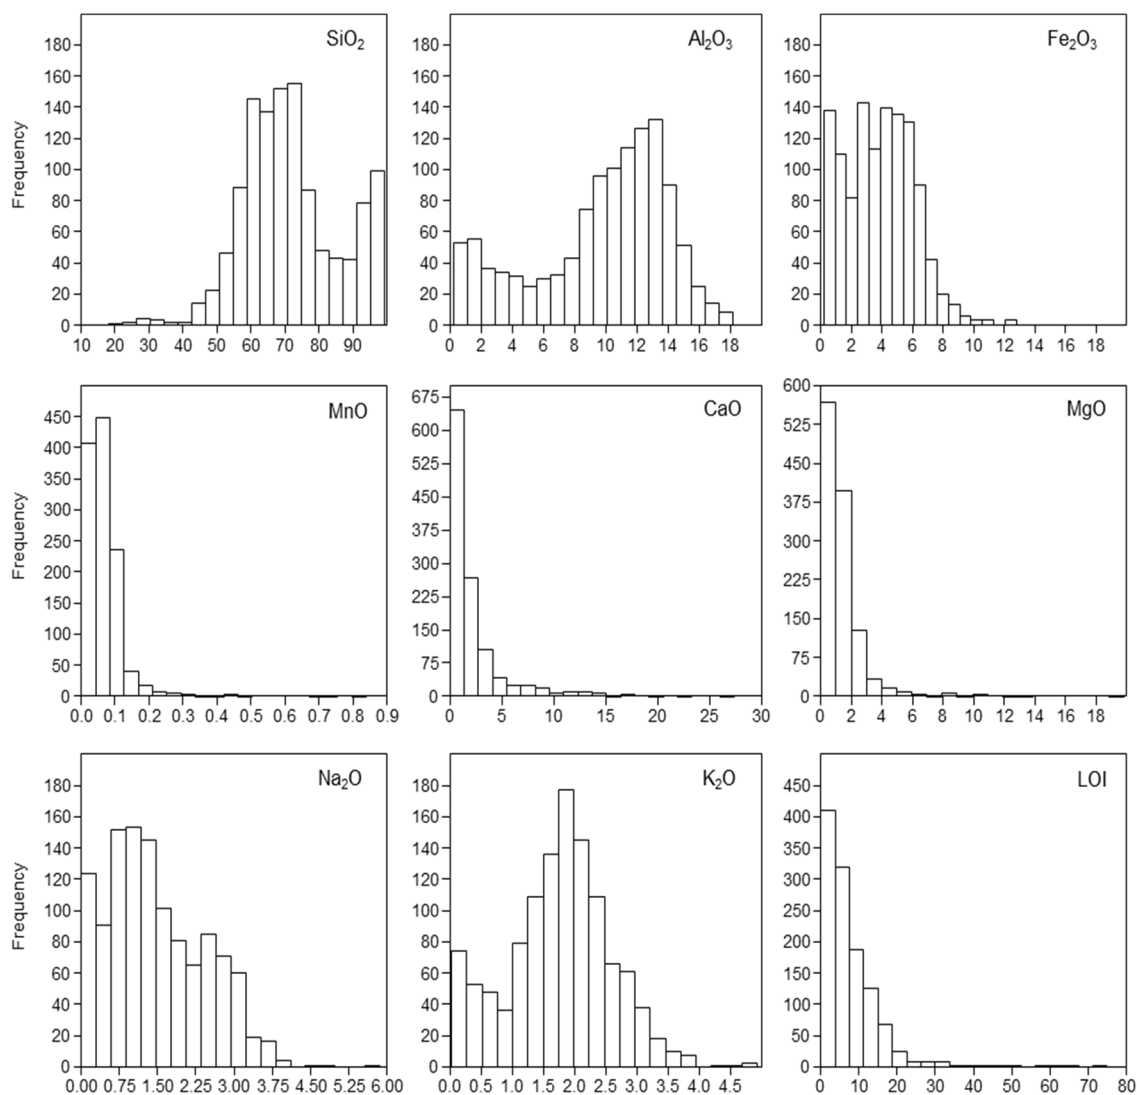

**Figure S4.** Histograms of major oxide content (wt%) and organic matter content (%LOI) in soil (depth-weighted to a maximum of 50 cm) for study sites across Canada ( $n = 1170$ ) from the Trent University Soil Archive and the North American Soil Geochemical Landscape Project. All data are not normally distributed (Shapiro-Wilk,  $p < 0.05$ ).

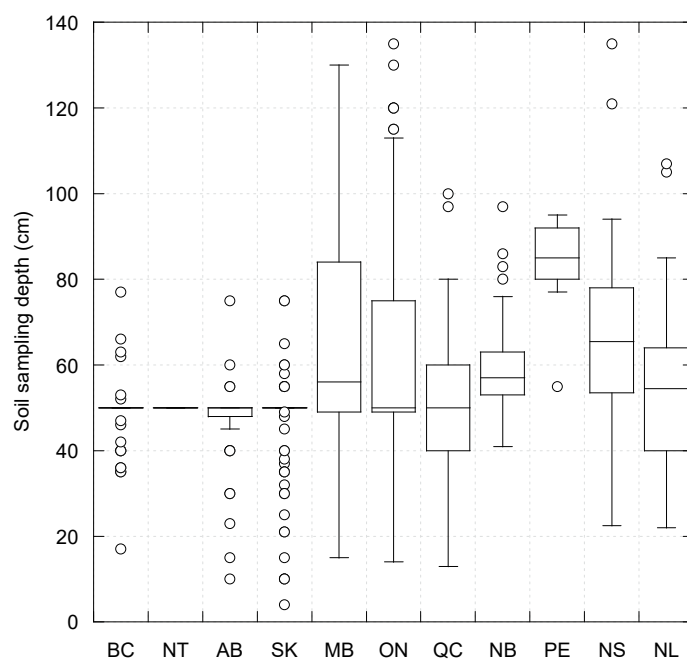

**Figure S5.** Boxplots showing the distribution of soil sampling depth (cm) by province for study sites across Canada (n = 1170) from the Trent University Soil Archive and North American Soil Geochemical Landscape Project.

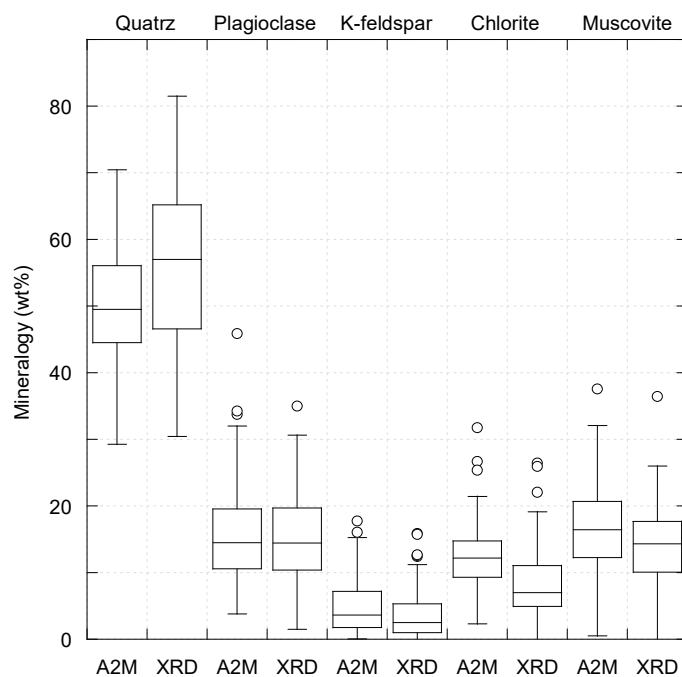

**Figure S6.** Boxplots showing the distribution of predicted A2M (Analysis-to-Mineralogy) against estimated XRD (X-Ray Diffraction) mineralogy (wt%) at 85 study sites across New Brunswick, Nova Scotia, and Prince Edward Island. See Table 3 for statistical comparison of each dataset.

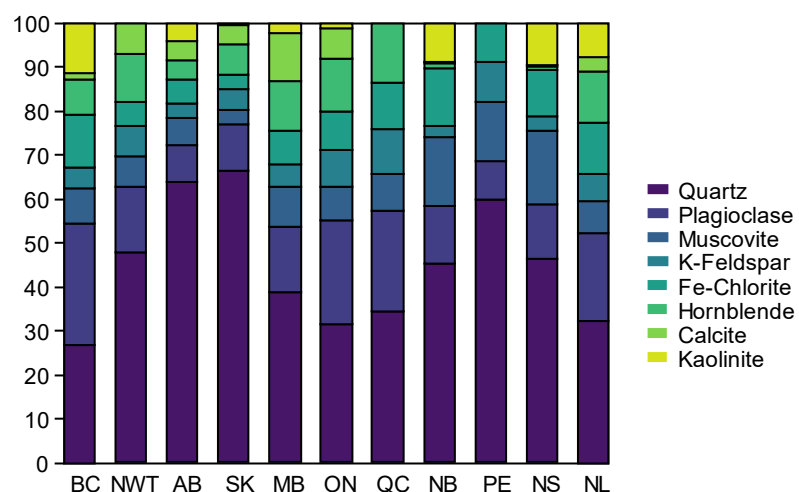

**Figure S7.** Predicted A2M (Analysis-to-Mineralogy) mineralogy (wt%) in soil (depth-weighted to a maximum of 50 cm) for study sites across Canada (n = 1170) from the Trent University Soil Archive and North American Soil Geochemical Landscape Project. Mineralogy (wt%) is summarised by province scaled as a proportion of 100%.

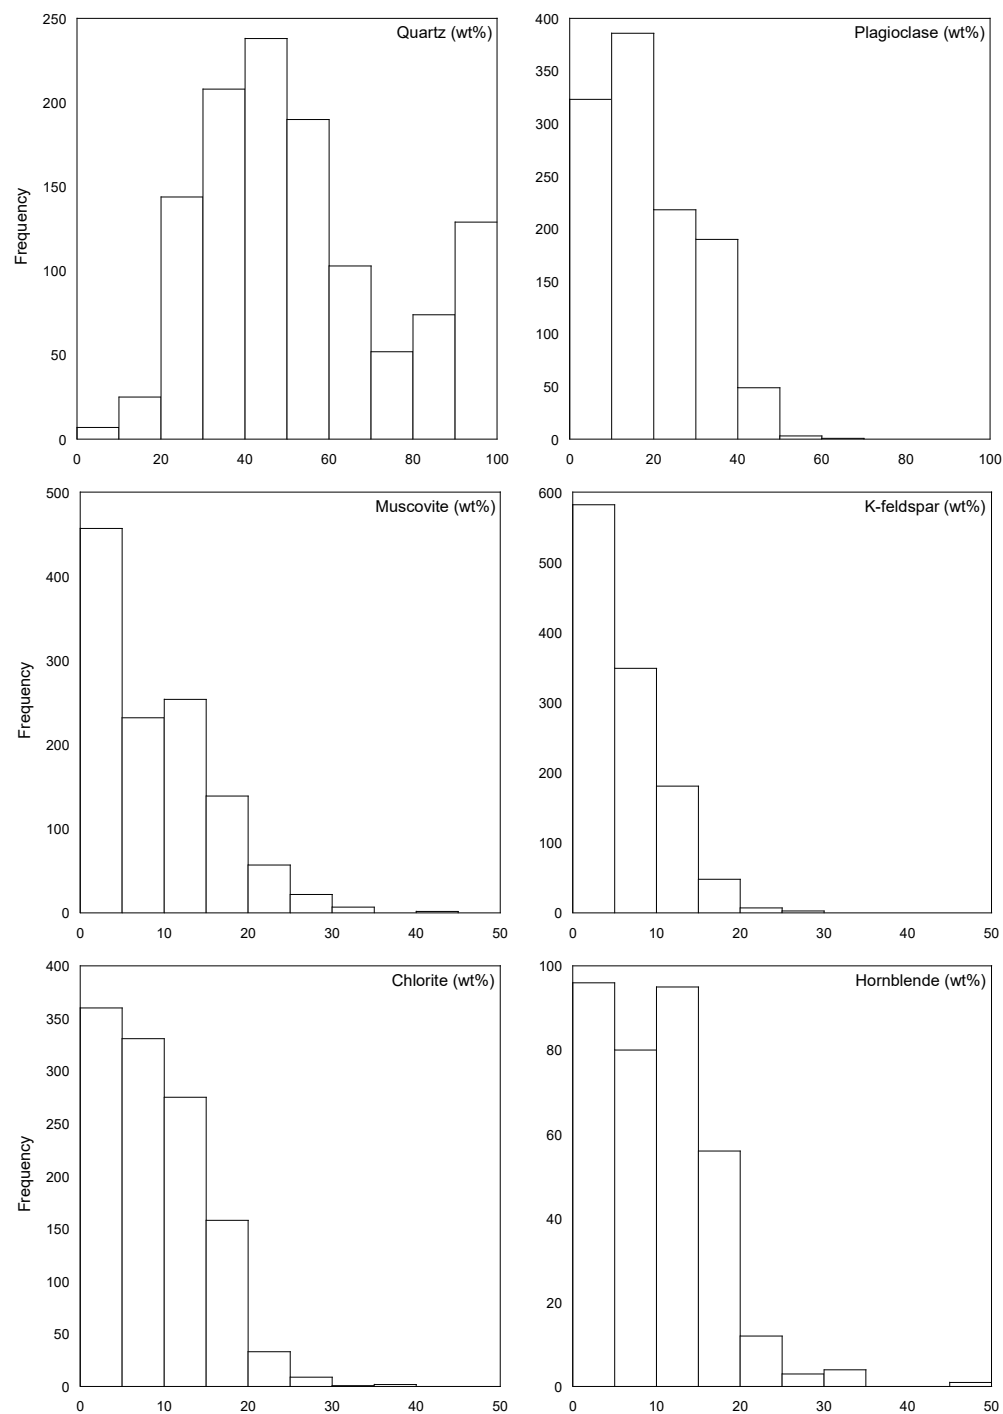

**Figure S8.** Histograms of A2M (Analysis-to-Mineralogy) predicted major mineralogical content (wt%) in soil (depth-weighted to a maximum of 50 cm) for study sites across Canada (n = 1170) from the Trent University Soil Archive and North American Soil Geochemical Landscape Project. All data are not normally distributed (Shapiro-Wilk,  $p < 0.05$ ).

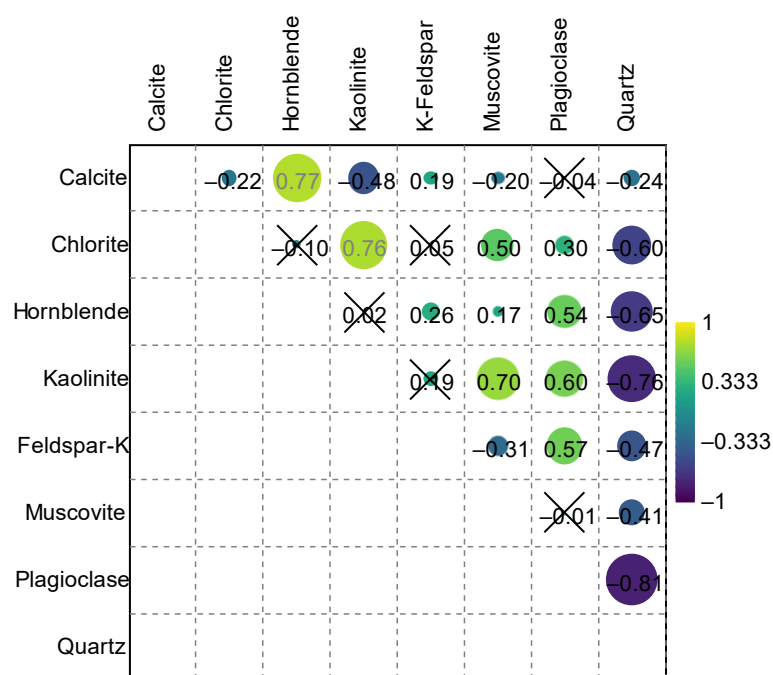

**Figure S9.** Correlation matrix of A2M (Analysis-to-Mineralogy) predicted major mineralogical content (wt%) in soil (depth-weighted to a maximum of 50 cm) for study sites across Canada (n = 1170) from the Trent University Soil Archive and North American Soil Geochemical Landscape Project. The strength of the correlation (r) is shown, and associations indicated by an 'X' are not significant.

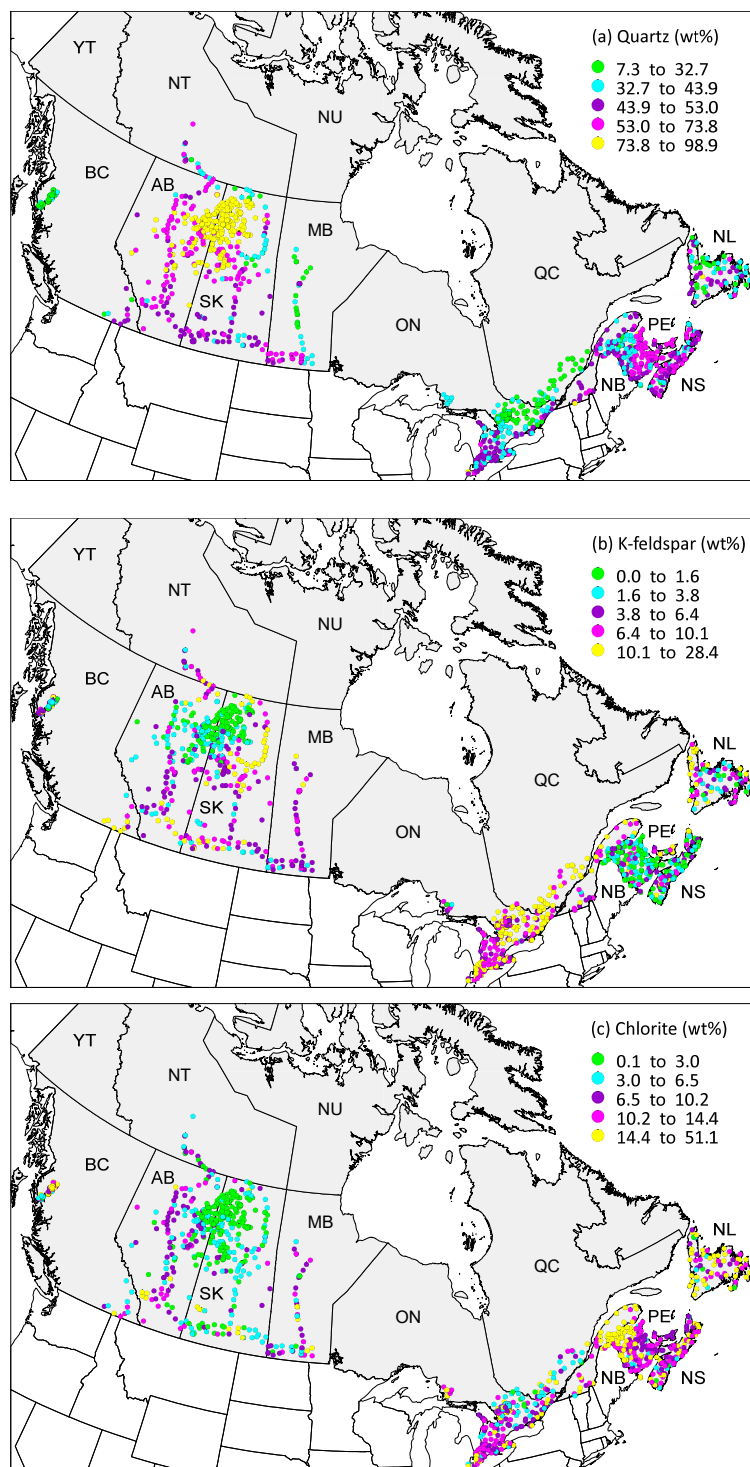

**Figure S10.** Predicted A2M (Analysis-to-Mineralogy) quantitative mineralogy (wt%) in soil (depth-weighted to a maximum of 50 cm) for (a) quartz, (b) K-feldspar, and (c) chlorite across Canada from the Trent University Soil Archive and North America Soil Geochemical Landscapes Project (n = 1170). Legends were set at equal distribution of sites among five categories.

**Table S2.** Study sites in Ontario (n = 10), Saskatchewan (n = 46), and Alberta (n = 10) with predicted A2M (Analysis-to-Mineralogy) and estimated XRD (X-Ray Diffraction) mineralogy.

| Prov | Quartz |       | Plagioclase |       | K-Feldspar |       | Chlorite |       | Muscovite |       | Hornblende |       |
|------|--------|-------|-------------|-------|------------|-------|----------|-------|-----------|-------|------------|-------|
|      | XRD    | A2M   | XRD         | A2M   | XRD        | A2M   | XRD      | A2M   | XRD       | A2M   | XRD        | A2M   |
| ON   | 34.23  | 26.46 | 33.38       | 31.43 | 13.91      | 4.09  | 0.00     | 9.56  | 3.32      | 15.69 | 12.47      | 12.77 |
| ON   | 43.38  | 37.98 | 27.52       | 24.92 | 10.47      | 7.75  | 1.91     | 4.98  | 6.80      | 12.78 | 4.63       | 11.59 |
| ON   | 45.52  | 37.57 | 32.87       | 33.44 | 12.47      | 10.74 | 0.00     | 4.33  | 0.40      | 6.33  | 6.42       | 7.59  |
| ON   | 51.38  | 44.14 | 19.39       | 20.45 | 10.45      | 9.93  | 2.57     | 5.93  | 9.52      | 8.37  | 2.65       | 11.18 |
| ON   | 34.61  | 28.43 | 34.03       | 33.40 | 17.83      | 11.25 | 0.00     | 6.39  | 1.44      | 9.01  | 10.04      | 11.51 |
| ON   | 36.97  | 26.20 | 32.63       | 33.84 | 17.37      | 7.70  | 2.64     | 5.76  | 1.29      | 13.01 | 7.91       | 13.49 |
| ON   | 43.17  | 36.63 | 21.08       | 18.99 | 16.63      | 9.32  | 3.15     | 8.82  | 5.00      | 12.28 | 5.54       | 13.97 |
| ON   | 44.91  | 36.50 | 28.88       | 32.76 | 18.29      | 12.88 | 0.00     | 13.60 | 2.03      | 4.25  | 5.45       | 0.00  |
| ON   | 50.64  | 38.56 | 30.74       | 32.69 | 9.99       | 2.39  | 2.08     | 12.43 | 0.86      | 13.92 | 4.45       | 0.00  |
| ON   | 30.93  | 26.76 | 35.49       | 28.84 | 14.04      | 4.64  | 0.00     | 9.90  | 2.54      | 16.27 | 15.39      | 13.59 |
| SK   | 39.00  | 37.11 | 40.69       | 40.43 | 14.50      | 13.96 | 0.62     | 1.36  | 2.02      | 2.59  | –          | –     |
| SK   | 34.99  | 29.71 | 31.40       | 25.59 | 17.10      | 6.51  | 3.19     | 6.77  | 4.30      | 17.30 | –          | –     |
| SK   | 13.54  | 7.26  | 20.94       | 28.52 | 0.00       | 1.30  | 4.01     | 10.44 | 9.67      | 4.40  | –          | –     |
| SK   | 94.68  | 92.29 | 3.63        | 4.05  | 1.29       | 1.33  | 0.00     | 1.32  | 0.00      | 1.01  | –          | –     |
| SK   | 96.96  | 96.05 | 1.78        | 0.72  | 0.83       | 0.02  | 0.00     | 1.37  | 0.00      | 1.83  | –          | –     |
| SK   | 97.73  | 97.47 | 1.27        | 0.07  | 1.01       | 0.07  | 0.00     | 1.71  | 0.00      | 0.69  | –          | –     |
| SK   | 98.89  | 97.89 | 0.47        | 0.07  | 0.00       | 0.02  | 0.00     | 1.19  | 0.00      | 0.84  | –          | –     |
| SK   | 99.73  | 97.96 | 0.00        | 0.07  | 0.00       | 0.07  | 0.00     | 1.24  | 0.00      | 0.66  | –          | –     |
| SK   | 100.0  | 97.96 | 0.00        | 0.07  | 0.00       | 0.03  | 0.00     | 1.36  | 0.00      | 0.60  | –          | –     |
| SK   | 93.56  | 94.38 | 3.00        | 1.00  | 1.70       | 0.99  | 0.51     | 1.88  | 0.71      | 1.76  | –          | –     |
| SK   | 95.68  | 94.35 | 1.13        | 1.12  | 1.00       | 0.02  | 0.87     | 1.75  | 0.98      | 2.77  | –          | –     |
| SK   | 96.51  | 92.97 | 1.67        | 2.53  | 1.27       | 0.86  | 0.00     | 1.73  | 0.00      | 1.92  | –          | –     |
| SK   | 95.72  | 95.86 | 2.30        | 1.29  | 1.31       | 0.59  | 0.00     | 1.37  | 0.00      | 0.89  | –          | –     |
| SK   | 89.96  | 91.28 | 5.29        | 3.23  | 2.08       | 0.73  | 0.00     | 1.52  | 0.76      | 3.23  | –          | –     |
| SK   | 90.64  | 88.13 | 4.89        | 4.60  | 1.97       | 0.17  | 0.29     | 3.12  | 0.81      | 3.98  | –          | –     |
| SK   | 46.14  | 43.30 | 43.44       | 42.61 | 9.17       | 9.89  | 0.00     | 3.88  | 0.00      | 0.32  | –          | –     |
| SK   | 80.50  | 79.77 | 11.30       | 10.21 | 5.84       | 5.38  | 0.00     | 2.57  | 0.76      | 2.08  | –          | –     |
| SK   | 88.04  | 88.00 | 5.61        | 5.29  | 3.25       | 2.02  | 0.89     | 2.04  | 1.62      | 2.64  | –          | –     |
| SK   | 96.88  | 95.56 | 1.51        | 0.23  | 1.52       | 0.33  | 0.00     | 1.48  | 0.00      | 1.11  | –          | –     |
| SK   | 59.00  | 52.86 | 26.73       | 26.20 | 10.52      | 8.51  | 1.02     | 5.73  | 0.41      | 6.71  | –          | –     |
| SK   | 66.97  | 63.35 | 21.70       | 20.77 | 9.28       | 7.10  | 0.38     | 5.00  | 0.00      | 3.78  | –          | –     |
| SK   | 96.63  | 95.81 | 1.94        | 0.89  | 1.43       | 0.17  | 0.00     | 1.52  | 0.00      | 1.61  | –          | –     |
| SK   | 87.68  | 84.28 | 8.47        | 7.20  | 2.88       | 2.08  | 0.00     | 3.32  | 0.22      | 3.11  | –          | –     |
| SK   | 86.42  | 97.70 | 8.56        | 0.07  | 3.17       | 0.32  | 0.56     | 1.16  | 0.00      | 0.75  | –          | –     |
| SK   | 98.58  | 97.53 | 0.60        | 0.25  | 0.82       | 0.08  | 0.00     | 1.13  | 0.00      | 1.02  | –          | –     |
| SK   | 68.68  | 63.94 | 16.40       | 16.88 | 7.78       | 9.83  | 2.24     | 6.12  | 3.08      | 3.22  | –          | –     |
| SK   | 36.81  | 33.06 | 32.90       | 33.45 | 18.70      | 18.15 | 0.57     | 3.66  | 4.17      | 4.76  | –          | –     |
| SK   | 96.70  | 94.55 | 1.76        | 1.03  | 1.33       | 0.39  | 0.00     | 2.78  | 0.00      | 1.25  | –          | –     |
| SK   | 92.69  | 89.18 | 4.56        | 4.69  | 2.24       | 2.56  | 0.00     | 2.81  | 0.00      | 0.77  | –          | –     |
| SK   | 43.06  | 39.21 | 33.29       | 35.03 | 15.43      | 14.72 | 1.62     | 7.23  | 2.38      | 3.81  | –          | –     |
| SK   | 28.43  | 26.22 | 36.04       | 39.51 | 16.49      | 18.81 | 3.18     | 15.31 | 8.46      | 0.15  | –          | –     |
| SK   | 35.46  | 31.64 | 43.40       | 42.27 | 5.63       | 8.10  | 0.60     | 3.30  | 1.60      | 3.70  | –          | –     |
| SK   | 35.04  | 34.93 | 33.44       | 34.47 | 12.43      | 8.12  | 2.19     | 14.06 | 8.70      | 8.43  | –          | –     |
| SK   | 95.08  | 93.11 | 1.92        | 7.07  | 2.05       | 1.26  | 0.00     | 1.90  | 1.02      | 11.29 | –          | –     |
| SK   | 80.26  | 77.26 | 8.78        | 8.21  | 4.32       | 4.71  | 0.00     | 4.93  | 4.72      | 4.90  | –          | –     |
| SK   | 85.59  | 87.44 | 7.39        | 5.64  | 2.40       | 3.10  | 1.12     | 2.44  | 1.81      | 1.38  | –          | –     |
| SK   | 72.65  | 69.62 | 12.54       | 13.39 | 6.75       | 7.31  | 1.75     | 5.00  | 4.33      | 4.67  | –          | –     |
| SK   | 82.52  | 92.60 | 9.17        | 2.24  | 5.28       | 1.01  | 0.00     | 2.04  | 3.12      | 0.98  | –          | –     |
| SK   | 70.03  | 66.08 | 14.61       | 16.71 | 6.70       | 9.22  | 0.36     | 0.74  | 2.98      | 1.39  | –          | –     |
| SK   | 81.33  | 80.37 | 9.18        | 8.77  | 5.14       | 6.05  | 0.00     | 2.96  | 2.44      | 1.85  | –          | –     |
| SK   | 57.63  | 58.07 | 13.58       | 13.55 | 7.76       | 3.90  | 0.00     | 8.69  | 12.18     | 15.79 | –          | –     |

|    |       |       |       |       |      |      |      |      |      |      |   |   |
|----|-------|-------|-------|-------|------|------|------|------|------|------|---|---|
| SK | 57.21 | 42.29 | 22.50 | 28.38 | 8.43 | 6.13 | 0.00 | 3.93 | 5.41 | 9.12 | – | – |
| SK | 62.46 | 60.03 | 22.08 | 22.36 | 7.87 | 9.82 | 0.00 | 6.04 | 3.58 | 1.75 | – | – |
| SK | 61.61 | 59.03 | 17.10 | 16.61 | 6.89 | 6.36 | 0.00 | 8.20 | 9.08 | 9.81 | – | – |
| SK | 59.86 | 48.83 | 18.38 | 14.58 | 6.41 | 8.08 | 0.00 | 6.59 | 3.81 | 2.40 | – | – |
| SK | 54.99 | 46.61 | 18.97 | 13.99 | 7.05 | 5.60 | 0.00 | 6.71 | 6.35 | 7.55 | – | – |
| AB | 87.46 | 84.74 | 3.86  | 2.23  | 4.68 | 0.30 | 0.39 | 3.97 | 2.50 | 8.76 | – | – |
| AB | 95.48 | 96.16 | 1.60  | 0.35  | 2.25 | 0.32 | 0.67 | 0.86 | 0.00 | 1.10 | – | – |
| AB | 91.35 | 87.38 | 4.11  | 5.18  | 4.15 | 3.61 | 0.00 | 2.41 | 0.00 | 1.42 | – | – |
| AB | 92.94 | 91.15 | 4.00  | 2.35  | 2.36 | 2.23 | 0.00 | 3.31 | 0.11 | 0.97 | – | – |
| AB | 95.03 | 92.07 | 2.66  | 1.80  | 2.31 | 0.69 | 0.00 | 1.97 | 0.00 | 3.46 | – | – |
| AB | 85.43 | 78.13 | 6.27  | 7.06  | 4.41 | 2.60 | 1.69 | 4.59 | 1.35 | 7.63 | – | – |
| AB | 92.96 | 90.25 | 2.95  | 3.24  | 2.37 | 1.75 | 0.42 | 2.33 | 0.77 | 2.44 | – | – |
| AB | 83.49 | 82.81 | 6.94  | 7.33  | 6.29 | 3.08 | 1.20 | 2.79 | 1.61 | 4.00 | – | – |
| AB | 82.00 | 81.97 | 7.21  | 7.40  | 4.33 | 3.18 | 0.00 | 3.25 | 2.35 | 4.20 | – | – |
| AB | 95.58 | 91.73 | 1.94  | 2.25  | 2.02 | 0.93 | 0.45 | 1.92 | 0.00 | 3.17 | – | – |

Hornblende was not determined by XRD (X-Ray Diffraction) for sites in Alberta (AB) and Saskatchewan (SK); as such, it was not included in A2M (Analysis-to-Mineralogy) prediction.
